1 Blood Feeding Induces Hemocyte Proliferation and Activation in the  
2 African Malaria Mosquito, *Anopheles gambiae* Giles

3 Running Title: A blood meal activates mosquito immunity

4

5 William B. Bryant and Kristin Michel\*

6

7

8 Division of Biology, Kansas State University, Manhattan, KS 66506, USA

9

10

11

12

13

14

15

16

17

18

19

20

21

22

23

24

25

26

27

28

29

30

31

32

33

34 \*Corresponding author. Tel: +1 785 532 0161; E-mail address: [kmichel@ksu.edu](mailto:kmichel@ksu.edu)

35

## 36 **Summary**

37 Malaria is a global public health problem especially in sub-Saharan Africa, where the mosquito  
38 *Anopheles gambiae* Giles serves as the major vector for the protozoan *Plasmodium falciparum*  
39 Welch. One determinant of malaria vector competence is the mosquito's immune system.  
40 Hemocytes are a critical component as they produce soluble immune factors that either support  
41 or prevent malaria parasite development. However, despite their importance in vector  
42 competence, understanding of their basic biology is just developing. Applying novel  
43 technologies to the study of mosquito hemocytes, we investigated the effect of blood meal on  
44 hemocyte population dynamics, DNA replication, and cell cycle progression. In contrast to  
45 prevailing published work, data presented here demonstrate that hemocytes in adult mosquitoes  
46 continue to undergo low basal levels of replication. In addition, blood ingestion caused  
47 significant changes in hemocytes within 24 h. Hemocytes displayed an increase in cell number,  
48 size, granularity, and Ras-MAPK signaling as well as altered cell surface moieties. As these  
49 changes are well-known markers of immune cell activation in mammals and *Drosophila*  
50 *melanogaster* Meig., we further investigated if a blood meal changes the expression of  
51 hemocyte-derived immune factors. Indeed, hemocytes 24 h post blood meal displayed higher  
52 levels of critical components of the complement and melanization immune reactions in  
53 mosquitoes. Taken together, this study demonstrates that the normal physiological process of a  
54 blood meal activates the innate immune response in mosquitoes. This process is likely in part  
55 regulated by Ras-MAPK signaling, highlighting a novel mechanistic link between blood feeding  
56 and immunity.

57  
58  
59  
60  
61  
62  
63  
64

**Key words:** *Anopheles gambiae*, mosquito, hemocytes, immunity, blood meal

## 65 **Introduction**

66 The female *Anopheles gambiae* mosquito is the major vector of malaria in sub-Saharan Africa.  
67 One of the most important determinants of vector competence is the mosquito's humoral  
68 immune system (Mitri and Vernick, 2012), which includes the production of reactive oxygen  
69 species, melanin synthesis, and complement activation. The cellular arm of the mosquito  
70 immune system is represented by hemocytes, which are the insect's equivalent to the myeloblast  
71 lineage of blood cells. These cells perform phagocytosis and encapsulation, produce free radicals  
72 of nitrogen and oxygen, and express the majority of molecules in the melanization and  
73 complement-like pathways including prophenoloxidase (PPO) and the thioester-containing  
74 protein (TEP)-1, respectively (Hillyer, 2010). In addition, studies suggest hemocytes are  
75 recruited to the midgut and dorsal vessel during *Plasmodium sp.* infection (Volz et al., 2005;  
76 Rodrigues et al., 2010; King and Hillyer, 2012), and may mediate innate "immune memory"  
77 (Rodrigues et al., 2010). However, despite the multi-faceted contribution of mosquito  
78 hemocytes to immunity against malaria parasites, little is known about their basic biology.

79  
80 Some mosquito hemocytes circulate freely in the hemocoel (Hall, 1983), while others are  
81 attached to a variety of tissues including midgut, trachea, muscles, dorsal vessel, Malpighian  
82 tubules, cephalic limbs, and maxillary palps (Barillas-Mury et al., 1999; Danielli et al., 2000;  
83 King and Hillyer, 2012, 2013). While true cell lineages have yet to be established, mosquito  
84 hemocytes are classified based on morphological and functional characteristics. Granulocytes  
85 represent 90% of the adult hemocyte population and are classified based on their granular  
86 appearance and their exclusive ability to spread on glass surfaces and phagocytize particles  
87 (Castillo et al., 2006). The remaining 10% are split equally into oenocytoids, which express  
88 factors required for melanization, and prohemocytes, which are believed to represent progenitor  
89 cells (Castillo et al., 2006). While generally it has been accepted that only 500-1000 hemocytes  
90 reside in an adult mosquito (reviewed in Hillyer, 2010), a recent study with improved *in-vivo*  
91 imaging techniques showed this number to be ~5,000 cells per mosquito two days posteclosion  
92 (King and Hillyer, 2013). Mosquitoes kept on sugar water exhibited a gradual decrease in  
93 hemocyte numbers (Hillyer et al., 2005).

94

95

96

97

98

99

100

101

102

103

104

105

106

107

108

109

110

111

112

113

114

115

116

117

118

119

120

121

122

Numerous studies in multiple insects clearly demonstrate the strong correlation between hemocyte numbers and immunity. *D. melanogaster* larvae parasitized by the parasitic wasp *Leptopilina boulandi* (Barbotin, Carton & Kelner-Pillault) show an increase in total number of hemocytes (Russo et al., 2001). Further, distinct genetic lines of *D. melanogaster* resistant to parasitoid wasps have almost twice the number of hemocytes as susceptible lines (Kraaijeveld et al., 2001). In tsetse flies, removal of their microbiota affects vector competence by decreasing hemocyte numbers, ultimately decreasing expression of important immune factors (Weiss et al., 2011; Weiss et al., 2012). Additionally, inoculation with *Dirofilaria immitis* (Leidy) microfilariae and *Escherichia coli* (Migula) results in hemocyte proliferation in *Aedes aegypti* L. and *An. gambiae*, respectively (Christensen et al., 1989; King and Hillyer, 2013). In contrast, infection with the rodent malaria parasite, *Plasmodium berghei* Fain, does not affect overall hemocyte number (Baton et al., 2009), but induces a number of changes. These include a relative increase in granulocytes compared to oenocytoids and prohemocytes (Baton et al., 2009; Rodrigues et al., 2010), TEP1 secretion (Frolet et al., 2006), changes in lectin binding (Rodrigues et al., 2010), changes in expression patterns (Pinto et al., 2009), and hemocyte aggregation near the ostia of the dorsal vessel of the mosquito (King and Hillyer, 2012). In the absence of infection, some studies show a blood meal induces an increase in circulating hemocyte numbers in *An. gambiae* and *Ae. aegypti* (Castillo et al., 2006; Baton et al., 2009). However, the consequences of a blood meal on different aspects of hemocyte biology have not been addressed.

The purpose of the present study was to determine whether the physiological event of a blood meal causes critical changes in *An. gambiae* hemocytes. Several highly conserved immune cell activation markers are detectable in hemocytes isolated from female mosquitoes 24 h after blood feeding. In addition, we found up-regulation of immune factors critical for the complement-like pathway and the melanization response demonstrating that a blood meal activates the immune response in mosquitoes.

## 123 **Results**

### 124 **Blood Meal Induces Hemocyte Proliferation**

125 To analyze hemocyte proliferation in *An. gambiae* we initially determined total hemocyte  
126 numbers using an established perfusion protocol (Castillo et al., 2006; Rodrigues et al., 2010).  
127 Hemocytes were collected from female mosquitoes that were either maintained on sugar solution  
128 or that had received a blood meal. Similar to the majority of previous reports in different  
129 mosquito species (Christensen et al., 1989; Hillyer et al., 2005; Castillo et al., 2006; Baton et al.,  
130 2009; Hillyer, 2010), we consistently observed hemocyte numbers in the range of ~500-2,500  
131 cells per mosquito. In agreement with published data (Castillo et al., 2006; Baton et al., 2009),  
132 hemocytes numbers increased consistently and significantly by 2.1 fold 24 h post blood meal  
133 (pbm) (U test,  $P=0.0058$ , Fig. 1A).

134 To determine whether the increase in hemocyte numbers is due to cell division or  
135 remobilization of sessile hemocytes, we assayed DNA replication in hemocytes by monitoring  
136 EdU incorporation into DNA. Sugar fed and 20 h pbm mosquitoes were injected with EdU, and  
137 their hemocytes were harvested 4 h post injection. This experimental setup allowed us to label  
138 hemocytes for 4 h at the time of proposed hemocyte cell division for the blood fed group and  
139 determine basal levels of DNA replication in the sugar fed group. The fluorescence signal due to  
140 EdU incorporation was striking and easily detected in perfused hemocytes by fluorescence  
141 microscopy (Fig. 1C). The percentage of EdU-positive hemocytes obtained from sugar fed  
142 mosquitoes was low with a median of 1.45% (Fig. 1B). This number increased to 26.2% in  
143 hemocytes obtained 24 h pbm, resulting in an 18-fold increase in EdU-positive cells (U-Test  
144  $P<0.0001$ , Fig. 1B). These data suggest that the increase of hemocytes after blood meal (Fig.  
145 1A) is due to cell division rather than remobilization of sessile hemocytes.

146 To determine if EdU incorporation in hemocytes is a result of mitotic activity and not due  
147 to increasing ploidy levels due to endoreplication, we employed cell cycle analysis by flow  
148 cytometry. Propidium iodide (PI) staining was used to analyze DNA content of hemocyte  
149 populations from either sugar fed or blood fed mosquitoes. PI staining was displayed as  
150 fluorescence signal in area versus width (Fig. 1D). Cell aggregates were excluded by gating  
151 (Givan, 2001), and histograms of distinct cell populations were obtained (Fig. 1D). Experiments  
152 were performed in triplicate, and for each treatment group and sample, the fixed number of

153 20,000 events was counted. Thus the data present the relative number of cells and not absolute  
154 values. Both treatment groups contained distinct hemocyte populations with varying DNA  
155 content ranging from 2C to 16C. Three markers (M1-M3) were placed to delineate these  
156 populations based on their ploidy levels, and to determine the percentage of cells within these  
157 populations. M1 contained euploid cells within different phases of the canonical cell cycle,  
158 defined by the characteristic G0/G1 (2C) and G2 (4C) peaks, with S phase in between. The other  
159 two markers highlight distinct populations of aneuploid cells with peaks at 8C (M2) or 16C  
160 (M3). In sugar fed and blood fed mosquitoes, euploid cells represented the dominant hemocyte  
161 population (Figs. 1D, 2A). In three experimental replicates, an average of 37.8% of hemocytes in  
162 sugar fed mosquitoes were aneuploid, having either an 8C or 16C DNA content. However, in  
163 blood fed mosquitoes on average only 11.3% of hemocytes were aneuploid, marking a 28%  
164 relative increase in euploid cells in blood fed mosquitoes (Fig. 2A, Fisher's Exact Test,  
165  $P < 0.0001$ ). Therefore, increase in EdU incorporation in hemocytes from blood fed mosquitoes  
166 was not due to endoreplication and increase in aneuploid cells, but rather a result of higher  
167 mitotic activity in the euploid cell population.

168

### 169 **Blood Meal Causes an Increase in Hemocyte Size and Granularity**

170 The flow cytometry analyses indicated that cell aggregation was also more prominent in  
171 hemocytes isolated from blood fed mosquitoes. In the dot plots shown in Fig. 1D, hemocytes  
172 from sugar fed mosquitoes fell within the gate, with few cell aggregates outside the gate. In  
173 contrast, hemocytes from blood fed mosquitoes formed large cell aggregates as indicated by the  
174 blue dots outside the gate. To investigate these and other potential phenotypic changes in  
175 hemocytes after blood meal, size and granularity properties were assessed. For this analysis, we  
176 focused solely on the gated euploid cell population, as they represented the major cell type based  
177 on DNA content (Figs. 1D and 2A).

178 Backgating analysis revealed the effects a blood meal on both size and granularity of  
179 hemocytes. In density dot plots, nearly 75% of all circulating hemocytes from sugar fed  
180 mosquitoes were found in the lower left quadrant (small size, low granularity) compared to only  
181 18.5% of hemocytes from blood fed mosquitoes (Fig. 2B, 2C). Nearly 60% of hemocytes from  
182 blood fed mosquitoes were found in the upper right quadrant, indicating larger cell size and  
183 increased granularity. This was confirmed by overlaying histograms of either FSC or SSC (Fig.

184 2D). Hemocytes from blood fed mosquitoes show a significantly increased average and range of  
185 size and granularity compared to sugar fed mosquitoes (Fig. 2D). The combined flow cytometry  
186 data clearly demonstrate that a blood meal causes significant changes in morphology of the  
187 euploid population of hemocytes.

188

### 189 **Blood Meal Activates Hemocytes**

190 The increase in cell number, aggregation, DNA replication, cell size and granularity of  
191 hemocytes after a blood meal are highly reminiscent of classical blood cell activation markers  
192 used in early immunological studies of mammalian leukocytes (Oppenheim and Rosenstreich,  
193 1976). Based on these findings, we assessed additional potential molecular changes that have  
194 been linked to blood cell activation in insects.

195 Infection of *D. melanogaster* larvae by parasitic wasps, an established invertebrate model  
196 for blood cell activation, is characterized by increased cell aggregation, WGA lectin binding, and  
197 Ras-MAPK signaling. We asked whether blood meal induces similar changes in *An. gambiae*.  
198 Hemocytes from sugar fed mosquitoes exhibited low WGA binding, while cells from blood fed  
199 individuals exhibited a much stronger binding signal (Fig. 3A), demonstrating blood meal-  
200 induced changes in surface carbohydrate moieties.

201 Phosphorylated ERK, a commonly used and highly conserved marker for Ras-MAPK  
202 signaling (pAgERK, AGAP009207), was readily detected in hemocytes isolated from adult  
203 female *An. gambiae*. IFAs showed punctate staining around the perimeter of nuclei as well as  
204 diffuse signals within nuclei in hemocytes isolated from sugar fed mosquitoes (Fig. 3B).  
205 Stronger fluorescent signals of pERK were consistently observed in hemocytes isolated 24 h  
206 pbm (Fig. 3B), clearly illustrating elevated Ras-MAPK signaling in hemocytes after blood meal.

207 In *An. gambiae*, hemocytes are the only source of several immune factors critical for  
208 complement and melanization, including TEP1 and PPO. To determine if expression of these  
209 immune factors was altered by a blood meal, IFAs were performed using anti-TEP1 and anti-  
210 PPO6-specific antibodies. TEP1 signals were low or undetectable in hemocytes from sugar fed  
211 females, and significantly increased after a blood meal, resulting in punctate/granular staining  
212 (Fig. 3C). PPO6 antibody yielded low punctate staining in hemocytes from sugar fed females,  
213 which increased after blood meal (Fig. 3D). At the same time, blood meal did not significantly

214 alter global protein production, as measured by incorporation and detection of a methionine  
215 analog (Fig. S1).

216 The increase of WGA binding, pERK signal, as well as TEP1 and PPO6 expression 24 h  
217 after blood meal was highly reproducible (Fig. S2) and statistically significant, as compared to  
218 control treatments (U-test,  $P < 0.0001$ , Fig. 3A-D).



## 219 Discussion

220 The innate immune response of the female mosquito is a major obstacle faced by malaria  
221 parasites while traveling through and developing in their obligate vector. Within the first 18-48 h  
222 after arrival within the mosquito, ookinetes, the motile zygote life stage of the parasite, encounter  
223 epithelial immune responses, characterized by the production of reactive oxygen and nitrogen  
224 species (Luckhart et al., 1998; Han et al., 2000; Oliveira Gde et al., 2012). At the same time, the  
225 mosquito's complement-like system, characterized by TEP1 and leucine-rich repeat proteins  
226 binds to the ookinete surface and ultimately kills and lyses the parasite (Blandin et al., 2004;  
227 Fraiture et al., 2009; Povelones et al., 2009). In certain genetic backgrounds, melanization, the  
228 production and deposition of eumelanin on the surface of the parasite further decreases the  
229 ookinete population within the first 48 h of infection. In contrast, cellular encapsulation of  
230 malaria parasites, a classical anti-parasitic cellular immune response in insects does not occur. A  
231 second cellular immune response, phagocytosis of malaria parasites has been observed after 10  
232 days post infection, but does not reduce significantly the parasite population (Hillyer et al.,  
233 2007). However, hemocytes contribute significantly to anti-malarial immunity (Ramirez et al.,  
234 2013), and they are the only source of many of the critical anti-parasitic humoral immune  
235 factors, including phenoloxidase (Muller et al., 1999) and TEP1 (Frolet et al., 2006).

236  
237 Malaria parasite infection induces a number of significant molecular changes in  
238 hemocytes (Baton et al., 2009; Pinto et al., 2009; Rodrigues et al., 2010), which limit parasite  
239 development (Pinto et al., 2009; Ramirez et al., 2013). However, all studies to date have  
240 evaluated hemocyte responses to infection as compared to a noninfectious blood meal. Given  
241 that blood meal alone increases hemocyte numbers circulating in the hemolymph of *An. gambiae*  
242 (Castillo et al., 2006; Baton et al., 2009; Castillo et al., 2011), focusing on changes induced by  
243 infection alone may thus underestimate the contribution of hemocytes to anti-parasitic immunity.  
244 *An. gambiae* females are anautogenous, and must take a blood meal to produce eggs to complete  
245 its life cycle. Simultaneously, mosquitoes can encounter many distinct blood-borne pathogens,  
246 whose infection they have to overcome for at least the next two to three days in order to lay their  
247 eggs. Therefore, survival of the 48 h to 72h after blood ingestion is critical to the fitness of the

248 species. We thus set out to evaluate the putative role of a blood meal on hemocyte stimulation  
249 and thus immune system activation.

250

251 Previous studies indicate that hemocytes in circulation increase after blood meal without  
252 determining if they were dividing or if sessile hemocytes were detaching (Castillo et al., 2006;  
253 Baton et al., 2009; Castillo et al., 2011). The base analog incorporation and flow cytometry data  
254 obtained in this study illustrate clearly that the increase in hemocytes after blood meal was due to  
255 mitosis instead of detachment of sessile hemocyte populations. Binucleated hemocytes  
256 undergoing mitosis in adult mosquitoes has previously only be demonstrated after bacterial  
257 infection (King and Hyllier, 2013). The EdU incorporation assay, which was established in this  
258 current study and can be used as a proxy for hemocyte proliferation, proved not only more  
259 convenient but also 10-fold more sensitive with a significantly wider dynamic range compared to  
260 established cell counting methodologies (Castillo et al., 2006). Surprisingly, flow cytometry  
261 analyses also revealed that up to 30% of hemocytes in naïve mosquitoes were aneuploid, with  
262 DNA content at or above 8C. Aneuploid blood cells are well known in mammals, e. g.  
263 megkaryocytes undergo endoreplication upon activation in mice, rats and humans (reviewed in  
264 Lee et al., 2009). Aneuploid hemocytes in insects have been reported in *Manduca sexta* (L.)  
265 (Nardi et al., 2003), however to our knowledge, this is the first description of their existence in  
266 dipterans. Future studies will evaluate how DNA content complements existing morphological  
267 classifications and how these criteria can be combined to discriminate hemocyte sub-populations.

268

269 As hypothesized, blood meal proved to induce significant changes in *An. gambiae*  
270 hemocytes. The ratio of euploid to aneuploid cells increased significantly, suggesting that cell  
271 division of the euploid cell population was stimulated rather than endoreplication. Similarly,  
272 changes in the relative abundance of different hemocyte populations have been reported after  
273 bacterial and parasite infection in different mosquito species (Christensen et al., 1989; Rodrigues  
274 et al., 2010; King and Hillyer, 2013). The only other vector species for which changes in  
275 hemocyte populations due to a blood meal have been observed is the kissing bug *Rhodnius*  
276 *prolixus* Stål, an important vector of Chagas disease (Jones, 1967).

277

278 In *D. melanogaster*, parasitoid wasp infection induces a number of significant changes in  
279 larval hemocytes that are required for an encapsulation response. Hemocytes differentiate and  
280 increase in numbers in response to the presence of parasitoid wasp eggs, ultimately resulting in  
281 hemocyte activation (Russo et al., 2001). Consequently, hemocytes aggregate around the wasp  
282 egg to form a tight capsule around the parasite (Nappi and Streams, 1969). This cell adhesion is  
283 mediated by significant molecular changes on the hemocyte's cell surface, which is also  
284 demonstrated by increased WGA lectin binding (Nappi and Silvers, 1984; Mortimer et al., 2012).  
285 Our study shows that blood meal ingestion causes strikingly similar changes in mosquito  
286 hemocytes. Not only did the number of *An. gambiae* hemocytes double, but WGA binding and  
287 the propensity of hemocytes to form aggregates increased significantly. These data strongly  
288 suggest that a blood meal indeed induces hemocyte activation in mosquitoes and thus elicits an  
289 immune response. This is further supported by our observation that TEP1 and PPO6 protein  
290 abundance increased significantly in hemocytes isolated from blood fed mosquitoes. Their  
291 immune-fluorescence analyses revealed punctuate staining patterns, at least partially explaining  
292 the more granular appearance of hemocytes isolated from blood fed mosquitoes as compared to  
293 sugar fed controls.

294  
295 The blood meal-induced hemocyte activation data presented here also draw strong  
296 parallels to mammalian blood cell activation. Upon activation, mammalian blood cells undergo  
297 mitotic replication (Oppenheim and Rosenstreich, 1976), increase in size and granularity (Cohn  
298 and Benson, 1965; Cook et al., 2004), and up-regulate vital immune factors (Bellingan, 1999;  
299 Wynn et al., 2013). The molecular mechanisms underlying blood cell activation are complex and  
300 include a number of highly conserved signaling pathways. For example, activation of  
301 macrophages can be stimulated by the granulocyte-macrophage colony stimulating factor, which  
302 binds to a receptor tyrosine kinase and signals through the Ras-mitogen activated protein kinase  
303 (MAPK) pathway (Cook et al., 2004). The same pathway also plays a critical role in lymphocyte  
304 activation (Downward et al., 1990; Cantrell, 2003). In *D. melanogaster*, Ras- MAPK signaling is  
305 activated in hemocytes after parasitic wasp infection (Sinenko et al., 2012) and plays a vital role  
306 in hemocyte homeostasis (Zettervall et al., 2004). Thus it was not surprising that we observed a  
307 consistent and statistically significant increase in Ras-MAPK signaling in mosquito hemocytes  
308 after a blood meal. Ras-MAPK signaling is likely not the only pathway required for hemocyte

309 proliferation and differentiation. Other likely candidates are the JAK/STAT, Jun kinase, and Toll  
310 pathways that control these processes in *D. melanogaster* (Zettervall et al., 2004). In addition,  
311 insulin signaling has recently been implicated in hemocyte proliferation after blood meal in the  
312 yellow fever mosquito, *Ae. aegypti* (Castillo et al., 2011). Another candidate is 20-  
313 hydroxyecdysone (20-E), which is circulating at increased levels in the mosquito's hemolymph  
314 after a blood meal (Clements, 2000; Bai et al., 2010). Expression of *PPO6* is increased by  
315 elevated levels of 20-E *in vitro* (Muller et al., 1999), suggesting that ecdysone signaling at least  
316 partially regulates blood meal-stimulated immune factor expression. Studies are on the way to  
317 identify the role of these signaling pathways in hemocyte proliferation and activation.

318

319       Taken together, this study identifies a blood meal as a significant immune system  
320 activator in *An. gambiae*. The factors that are upregulated upon blood ingestion have broad anti-  
321 pathogenic activity. TEP-1 and PPO can limit parasite and bacterial infections (Levashina et al.,  
322 2001; Blandin et al., 2004; Volz et al., 2006; Schnitger et al., 2007; Fraiture et al., 2009;  
323 Povelones et al., 2009), and PPO further aids in the defense against fungi (Yassine et al., 2012),  
324 and filarial worms (Guo et al., 1995). This suggests that the mosquito's immune system is  
325 primed to act against a broad range of putative pathogens which may be encountered in a blood  
326 meal. Furthermore, we provide a new mechanistic link between blood meal and immunity, which  
327 enables future molecular studies on trade-offs between mosquito immunity and fecundity.

328

## 329 **Materials and Methods**

### 330 Mosquito rearing and maintenance

331 The *An. gambiae* G3 strain was reared according to our standard protocol (An et al., 2011).  
332 Mosquitoes were starved for ~6-12 h before blood feeding. Heparinized horse blood (Plasvacc,  
333 Templeton, CA, USA) was provided through an artificial membrane feeding system.

334

### 335 Hemocyte collection and counts

336 Hemocytes were collected by perfusion using a modified protocol (Castillo et al., 2006;  
337 Rodrigues et al., 2010). Mosquitoes were injected with ~276 nl Anticoagulant buffer (60% of  
338 Schneider medium, 10% FBS, 30% citrate buffer [98 mM NaOH, 186 mM NaCl, 1.7 mM  
339 EDTA, 41 mM citrate], 1 μM DAPI) using a Nanoject II system (Drummond Scientific  
340 Company, Broomall, PA, USA) and incubated on ice for 10-15 minutes. Using forceps, a small  
341 tear was made into the penultimate abdominal segment and ~6-10 μl of anticoagulant buffer was  
342 perfused through the hemocoel at a rate of 1 μl/dispension using a Hamilton syringe system (see  
343 Fig. S3). The perfused hemolymph was loaded immediately into disposable hemocytometers  
344 (Incyto, Chungnam-do, Korea) to determine hemocyte numbers following manufacturer's  
345 instructions.

346

### 347 EdU Incorporation Assay

348 EdU assays were performed with the Click-iT<sup>®</sup> EdU Alexa Fluor<sup>®</sup> 488 Imaging kit (Invitrogen,  
349 Grand Island, NY, USA) following manufacturer's instructions. Mosquitoes were injected with  
350 138 nl of 20mM EdU in PBS and allowed to recover under normal rearing conditions. Four  
351 hours after injection, hemocytes were collected by perfusion (see above) onto PTFE printed glass  
352 slides (Electron Microscopy Sciences, Hatfield, PA, USA). After 1 h incubation at 4°C, perfusion  
353 buffer was replaced with fixative (4% formaldehyde in PBS), and incubated for 15 min at room  
354 temperature (RT). Cells were washed twice with 3% BSA in PBS, and permeabilized in 0.5%  
355 Triton X-100 in PBS for 20 min. Subsequently, cells were washed twice with 3% BSA in PBS,  
356 incubated in the dark with the Click-iT<sup>®</sup> Reaction Cocktail for 30 min at RT, and washed again  
357 with 3% BSA in PBS. Cells were mounted in VectaShield medium (Vector Laboratories Inc.,  
358 Burlingame, CA, USA), slides were sealed with nail polish, and stored at 4° C. EdU

359 incorporation was determined by fluorescence microscopy using an Axioplan2 fluorescent light  
360 microscope (Zeiss, Jena, Germany), and expressed as fraction of positive cells in a pool of at  
361 least 300-400 hemocytes.

362

### 363 Cell Cycle Analysis by Flow Cytometry

364 Hemocytes were collected into anticoagulant buffer without DAPI by perfusion as described  
365 above. Hemocytes were pooled from 60-75 mosquitoes. Each pool was collected on ice within 1  
366 h and immediately centrifuged at 2350 x g at 4°C. Cells were resuspended in 200 µl PBS with  
367 0.1% FBS. 700 µl of 70% ethanol was added drop wise to the cells and incubated for 1 h at RT.  
368 Cells were centrifuged again at 2350 x g at 4°C and resuspended in 200 µl of PI solution (50  
369 µg/ml Propidium Iodide, 100 µg/ml RNaseA, 0.1% Triton X-100, 0.1 mM EDTA in PBS). Cells  
370 were incubated for at least 1 h at 4°C, and pushed through a 40 µm nylon filter (Becton  
371 Dickinson Falcon, San Jose, CA, USA) to remove large cell aggregates. Cells were analyzed  
372 with a FACSCalibur cytometer (Becton Dickinson, Franklin Lakes, NJ, USA), obtaining 20,000  
373 events per sample at a rate not exceeding 150 events/s. Data were analyzed using WinList  
374 software (Verity Software House, Topsham, ME, USA). Events were gated and their  
375 corresponding histograms were obtained. Additionally, cell populations with differences in DNA  
376 content were backgated to determine size (FSC-H) and granularity (SSC-H). To backgate cells,  
377 first a dot plot based on PI (DNA) signal was drawn up for both sugar- and blood-fed  
378 mosquitoes. Gated populations of interest were analyzed for size (FSC-H) and granularity (SSC-  
379 H) in density dot plots and overlaying histograms.

380

### 381 Immunofluorescence analysis (IFA)

382 Hemocytes from two mosquitoes were collected and pooled onto PTFE-printed glass slides  
383 (Electron Microscopy Sciences, Hatfield, PA, USA) as described above. Cells were incubated at  
384 4°C for 1 h. Cells were fixed with 4% formaldehyde for 15 min at room temperature. Cells were  
385 incubated with blocking buffer (5% BSA, 0.3% Triton X-100 with PBS as diluent) for 1 h at RT.  
386 Cells were exposed to primary antibodies in antibody dilution buffer (1% BSA, 0.3% Triton X-  
387 100 in PBS) overnight at 4°C. The following primary antibodies were used at the indicated  
388 dilutions: rabbit anti-TEP-1, 1:350 (Povelones et al., 2009); rat anti-PPO6, 1:1000 (Muller et al.,  
389 1999); rabbit anti-Phospho-p44/42 MAPK (Erk1/2) (Thr202/Tyr204), 1:30 (cat#4370, Cell

390 Signaling, Boston, MA, USA). Cells were washed in PBS three times, and incubated with  
391 secondary antibody in antibody dilution buffer in the dark for 1-2 h at RT. The following  
392 secondary antibodies were used at the indicated dilutions: IgG (H + L) Alexa Fluor<sup>®</sup> 594  
393 (Invitrogen, Grand Island, NY, USA) goat anti-rabbit at 1:500 (TEP1) or 1:100 (pERK); IgG (H  
394 + L) Alexa Fluor<sup>®</sup> 594 (Invitrogen, Grand Island, NY, USA) goat anti-rat at 1:1000 (PPO6).  
395 Cells were rinsed in PBS three times and mounted in Vectashield (Vector labs, Burlingame, CA).  
396 Slides were sealed using nail polish and stored at 4° C until further analysis.

397

#### 398 Lectin staining

399 To determine lectin staining of hemocytes, we followed protocols developed by (Rizki and  
400 Rizki, 1983). Hemocytes from two mosquitoes were collected by perfusion and pooled onto  
401 PTFE printed glass slides (Electron Microscopy Sciences, Hatfield, PA, USA) as described  
402 above. Cells were incubated at 4°C for 1 h, and washed with PBS. Cells were fixed with 4%  
403 formaldehyde in PBS for 15 min at room temperature. Fixative was removed and cells were  
404 washed twice with PBS. Cells were stained with 10 µg/ml of Wheat Germ Agglutinin (WGA,  
405 Vector Labs, Burlingame, CA) in PBS for 10 min at room temperature in the dark. Cells were  
406 subsequently washed twice with PBS containing 0.3% Triton X-100 to remove unbound lectin,  
407 and mounted in Vectashield (Vector labs, Burlingame, CA). Slides were sealed with nail polish  
408 and stored at 4° C until further analysis.

409

#### 410 Metabolic protein labeling using Fluorescent noncanonical amino acid tagging (FUNCAT)

411 To quantify total protein production in hemocytes in sugar-fed and blood fed mosquitoes, we  
412 labelled proteins through incorporation of the amino acid analog, L-azidohomoalanine (AHA) *in*  
413 *vivo* and detected of the incorporated azide by click-it chemistry (Hinz et al., 2012). FUNCAT  
414 assays were performed with the Click-iT<sup>®</sup> AHA Alexa Fluor<sup>®</sup> 488 Protein Synthesis assay  
415 (Invitrogen, Grand Island, NY, USA) following manufacturer's instructions. Mosquitoes were  
416 injected with 138 nl of 2.5mM AHA in PBS and allowed to recover under normal rearing  
417 conditions. As expected, intensity of signal was strongly time dependent (Fig. S1). Virtually no  
418 AHA incorporation was detectable at 10 min after injection, while a strong signal was observed  
419 after four hours post injection. All subsequent assays were thus performed using a four hour  
420 labeling period. Hemocytes were collected, fixed and processed as described above for the EdU



421 assays and according to the manufacturer's protocol. Cells were mounted in VectaShield  
422 medium (Vector Laboratories Inc., Burlingame, CA, USA), slides were sealed with nail polish,  
423 and stored at 4° C until further analysis.

424

#### 425 Quantification of Immunofluorescence, Lectin, and AHA Staining

426 To quantify pERK, TEP1, PPO6, WGA, and AHA signals of hemocytes from sugar fed and  
427 blood fed mosquitoes, TIFF images were obtained with an Axioplan2 fluorescent light  
428 microscope (Zeiss, Jena, Germany) equipped with a camera and processed using the imaging  
429 software Image J (<http://rsb.info.nih.gov/ij/>). All images were taken with identical magnification.  
430 In addition, optimal fluorescence intensities and exposure times were empirically determined for  
431 each marker and kept constant between the two treatment groups. TIFF files were imported into  
432 Image J, where circles were drawn around cells and raw intensity values were obtained. To  
433 determine background fluorescence, the same circle was used to measure raw intensity values of  
434 a blank space in the image, which was subtracted from foreground values. Between 69 to 180  
435 cells were analyzed per biological replicate and treatment group. Experiments were performed in  
436 triplicate with three independent biological replicates (Fig. S1 and 2).

437

#### 438 Confocal microscopy and image analysis

439 Representative images were obtained using a LSM700 Confocal Microscope (Zeiss, Jena,  
440 Germany) using identical laser and microscope settings between samples. Images were processed  
441 using ZEN 2010 software (Zeiss, Jena, Germany), and figures were prepared with Photoshop and  
442 Illustrator software (Adobe Systems, San Jose, CA, USA).

443



444 **Acknowledgements**

445 We thank members of the Michel lab for mosquito rearing. We thank Drs. R. Clem and M.  
446 Herman (Kansas State University, USA) for use of their microscopes. We further are grateful to  
447 Dr. Philine Wangemann and Mr. Joel Sanneman at the Confocal Microfluorometry &  
448 Microscopy, and Molecular Biology & Biochemistry Cores at Kansas State University, T.  
449 Koopman and the Fleming Lab at Kansas State University for flow cytometry assistance, and  
450 Drs. L. Garver and C. Barillas-Mury (NIH-NIAID) for hemocyte perfusion and counting  
451 protocols. In addition, we thank Drs. M. Povelones and G. Christophides (Imperial College  
452 London, UK) for the kind gift of the TEP1 antibody, and Dr. H.-M. Mueller (University of  
453 Heidelberg, Germany) for the PPO6 antibody.

454

455

456 **Funding**

457 This study was supported by the National Institutes of Health [P20-RR017686, R01-AI095842 to  
458 K.M., F32-AI104154 to W.B.B.].

459

460

461 **Author Contributions**

462 Conceived and designed experiments: WBB, KM. Performed experiments: WBB. Analyzed  
463 data: WBB, KM. Wrote paper: WBB, KM.

464

465

466 **Competing Interests**

467 The authors declare no competing interests.

## References

- An, C., Budd, A., Kanost, M. R. and Michel, K.** (2011). Characterization of a regulatory unit that controls melanization and affects longevity of mosquitoes. *Cell Mol Life Sci* **68**, 1929-1939.
- Bai, H., Gelman, D. B. and Palli, S. R.** (2010). Mode of action of methoprene in affecting female reproduction in the African malaria mosquito, *Anopheles gambiae*. *Pest management science* **66**, 936-943.
- Barillas-Mury, C., Han, Y. S., Seeley, D. and Kafatos, F. C.** (1999). *Anopheles gambiae* Ag-STAT, a new insect member of the STAT family, is activated in response to bacterial infection. *Embo J* **18**, 959-967.
- Baton, L. A., Robertson, A., Warr, E., Strand, M. R. and Dimopoulos, G.** (2009). Genome-wide transcriptomic profiling of *Anopheles gambiae* hemocytes reveals pathogen-specific signatures upon bacterial challenge and *Plasmodium berghei* infection. *BMC genomics* **10**, 257.
- Bellingan, G.** (1999). Inflammatory cell activation in sepsis. *British medical bulletin* **55**, 12-29.
- Blandin, S., Shiao, S. H., Moita, L. F., Janse, C. J., Waters, A. P., Kafatos, F. C. and Levashina, E. A.** (2004). Complement-like protein TEPI is a determinant of vectorial capacity in the malaria vector *Anopheles gambiae*. *Cell* **116**, 661-670.
- Cantrell, D. A.** (2003). GTPases and T cell activation. *Immunol Rev* **192**, 122-130.
- Castillo, J., Brown, M. R. and Strand, M. R.** (2011). Blood Feeding and Insulin-like Peptide 3 Stimulate Proliferation of Hemocytes in the Mosquito *Aedes aegypti*. *PLoS pathogens* **7**, e1002274.
- Castillo, J. C., Robertson, A. E. and Strand, M. R.** (2006). Characterization of hemocytes from the mosquitoes *Anopheles gambiae* and *Aedes aegypti*. *Insect Biochem Mol Biol* **36**, 891-903.
- Christensen, B. M., Huff, B. M., Miranpuri, G. S., Harris, K. L. and Christensen, L. A.** (1989). Hemocyte population changes during the immune response of *Aedes aegypti* to inoculated microfilariae of *Dirofilaria immitis*. *The Journal of parasitology* **75**, 119-123.
- Clements, A. N.** (2000). *The Biology of Mosquitoes Volume 1: Development, Nutrition and Reproduction*. Wallingford, Oxon, UK: CABI Publishing.

- Cohn, Z. A. and Benson, B.** (1965). The in vitro differentiation of mononuclear phagocytes. 3. The reversibility of granule and hydrolytic enzyme formation and the turnover of granule constituents. *The Journal of experimental medicine* **122**, 455-466.
- Cook, A. D., Braine, E. L. and Hamilton, J. A.** (2004). Stimulus-dependent requirement for granulocyte-macrophage colony-stimulating factor in inflammation. *Journal of immunology* **173**, 4643-4651.
- Danielli, A., Loukeris, T. G., Lagueux, M., Muller, H. M., Richman, A. and Kafatos, F. C.** (2000). A modular chitin-binding protease associated with hemocytes and hemolymph in the mosquito *Anopheles gambiae*. *Proceedings of the National Academy of Sciences of the United States of America* **97**, 7136-7141.
- Downward, J., Graves, J. D., Warne, P. H., Rayter, S. and Cantrell, D. A.** (1990). Stimulation of p21ras upon T-cell activation. *Nature* **346**, 719-723.
- Fraiture, M., Baxter, R. H., Steinert, S., Chelliah, Y., Frolet, C., Quispe-Tintaya, W., Hoffmann, J. A., Blandin, S. A. and Levashina, E. A.** (2009). Two mosquito LRR proteins function as complement control factors in the TEP1-mediated killing of *Plasmodium*. *Cell Host Microbe* **5**, 273-284.
- Frolet, C., Thoma, M., Blandin, S., Hoffmann, J. A. and Levashina, E. A.** (2006). Boosting NF-kappaB-dependent basal immunity of *Anopheles gambiae* aborts development of *Plasmodium berghei*. *Immunity* **25**, 677-685.
- Givan, A.** (2001). *Flow Cytometry First Principles*. New York: Wiley-Liss.
- Guo, X., Beerntsen, B. T., Zhao, X. and Christensen, B. M.** (1995). Hemocyte alterations during melanotic encapsulation of *Brugia malayi* in the mosquito *Armigeres subalbatus*. *The Journal of parasitology* **81**, 200-207.
- Hall, D. W.** (1983). Mosquito hemocytes: a review. *Developmental and comparative immunology* **7**, 1-12.
- Han, Y. S., Thompson, J., Kafatos, F. C. and Barillas-Mury, C.** (2000). Molecular interactions between *Anopheles stephensi* midgut cells and *Plasmodium berghei*: the time bomb theory of ookinete invasion of mosquitoes. *Embo J* **19**, 6030-6040.
- Hillyer, J. F.** (2010). Mosquito immunity. *Advances in experimental medicine and biology* **708**, 218-238.

- Hillyer, J. F., Barreau, C. and Vernick, K. D.** (2007). Efficiency of salivary gland invasion by malaria sporozoites is controlled by rapid sporozoite destruction in the mosquito haemocoel. *Int J Parasitol* **37**, 673-681.
- Hillyer, J. F., Schmidt, S. L., Fuchs, J. F., Boyle, J. P. and Christensen, B. M.** (2005). Age-associated mortality in immune challenged mosquitoes (*Aedes aegypti*) correlates with a decrease in haemocyte numbers. *Cellular microbiology* **7**, 39-51.
- Hinz, F. I., Dieterich, D. C., Tirrell, D. A. and Schuman, E. M.** (2012) Non-canonical amino acid labeling in vivo to visualize and affinity purify newly synthesized proteins in larval zebrafish. *ACS Chem Neurosci*. **3**, 40-49.
- Jones, J. C.** (1967). Normal Differential Counts of Haemocytes in Relation to Ecdysis and Feeding in *Rhodnius*. *J. Insect Physiol.* **13**, 1133-1141.
- King, J. G. and Hillyer, J. F.** (2012). Infection-induced interaction between the mosquito circulatory and immune systems. *PLoS pathogens* **8**, e1003058.
- King, J. G. and Hillyer, J. F.** (2013). Spatial and temporal in vivo analysis of circulating and sessile immune cells in mosquitoes: hemocyte mitosis following infection. *BMC biology* **11**, 55.
- Kraaijeveld, A. R., Limentani, E. C. and Godfray, H. C.** (2001). Basis of the trade-off between parasitoid resistance and larval competitive ability in *Drosophila melanogaster*. *Proceedings. Biological sciences / The Royal Society* **268**, 259-261.
- Lee, H. O., Davidson, J. M. and Duronio, R. J.** (2009). Endoreplication: polyploidy with purpose. *Genes Dev* **23**, 2461-2477.
- Levashina, E. A., Moita, L. F., Blandin, S., Vriend, G., Lagueux, M. and Kafatos, F. C.** (2001). Conserved role of a complement-like protein in phagocytosis revealed by dsRNA knockout in cultured cells of the mosquito, *Anopheles gambiae*. *Cell* **104**, 709-718.
- Luckhart, S., Vodovotz, Y., Cui, L. and Rosenberg, R.** (1998). The mosquito *Anopheles stephensi* limits malaria parasite development with inducible synthesis of nitric oxide. *Proceedings of the National Academy of Sciences of the United States of America* **95**, 5700-5705.
- Mitri, C. and Vernick, K. D.** (2012). *Anopheles gambiae* pathogen susceptibility: the intersection of genetics, immunity and ecology. *Current opinion in microbiology* **15**, 285-291.
- Mortimer, N. T., Kacsoh, B. Z., Keebaugh, E. S. and Schlenke, T. A.** (2012). Mgat1-dependent N-glycosylation of membrane components primes *Drosophila melanogaster* blood cells for the cellular encapsulation response. *PLoS pathogens* **8**, e1002819.

- Muller, H. M., Dimopoulos, G., Blass, C. and Kafatos, F. C.** (1999). A hemocyte-like cell line established from the malaria vector *Anopheles gambiae* expresses six prophenoloxidase genes. *The Journal of biological chemistry* **274**, 11727-11735.
- Nappi, A. J. and Streams, F. A.** (1969). Haemocytic reactions of *Drosophila melanogaster* to the parasites *Pseudocoila mellipes* and *P. bochei* *Journal of insect physiology* **15**, 1551–1554.
- Nappi, A. J. and Silvers, M.** (1984). Cell surface changes associated with cellular immune reactions in *Drosophila*. *Science* **225**, 1166-1168.
- Nardi, J. B., Pilas, B., Ujhelyi, E., Garsha, K. and Kanost, M. R.** (2003). Hematopoietic organs of *Manduca sexta* and hemocyte lineages. *Dev Genes Evol* **213**, 477-491.
- Oliveira Gde, A., Lieberman, J. and Barillas-Mury, C.** (2012). Epithelial nitration by a peroxidase/NOX5 system mediates mosquito antiplasmodial immunity. *Science* **335**, 856-859.
- Oppenheim, J. and Rosenstreich, D.** (1976). *Mitogens in Immunobiology*. New York: Academic Press.
- Pinto, S. B., Lombardo, F., Koutsos, A. C., Waterhouse, R. M., McKay, K., An, C., Ramakrishnan, C., Kafatos, F. C. and Michel, K.** (2009). Discovery of *Plasmodium* modulators by genome-wide analysis of circulating hemocytes in *Anopheles gambiae*. *Proceedings of the National Academy of Sciences of the United States of America* **106**, 21270-21275.
- Povelones, M., Waterhouse, R. M., Kafatos, F. C. and Christophides, G. K.** (2009). Leucine-rich repeat protein complex activates mosquito complement in defense against *Plasmodium* parasites. *Science* **324**, 258-261.
- Ramirez, J. L., Garver, L. S., Brayner, F. A., Alves, L. C., Rodrigues, J., Molina-Cruz, A. and Barillas-Mury, C.** (2013). The role of hemocytes in *Anopheles gambiae* antiplasmodial immunity. *Journal of innate immunity*. DOI: 10.1159/000353765
- Rizki, T. M. and Rizki, R. M.** (1983). Blood cell surface changes in *Drosophila* mutants with melanotic tumors. *Science* **220**, 73-75.
- Rodrigues, J., Brayner, F. A., Alves, L. C., Dixit, R. and Barillas-Mury, C.** (2010). Hemocyte differentiation mediates innate immune memory in *Anopheles gambiae* mosquitoes. *Science* **329**, 1353-1355.

- Russo, J., Brehelin, M. and Carton, Y.** (2001). Haemocyte changes in resistant and susceptible strains of *D. melanogaster* caused by virulent and avirulent strains of the parasitic wasp *Leptopilina boulardi*. *Journal of insect physiology* **47**, 167-172.
- Schnitger, A. K., Kafatos, F. C. and Osta, M. A.** (2007). The melanization reaction is not required for survival of *Anopheles gambiae* mosquitoes after bacterial infections. *The Journal of biological chemistry*.
- Sinenko, S. A., Shim, J. and Banerjee, U.** (2012). Oxidative stress in the haematopoietic niche regulates the cellular immune response in *Drosophila*. *EMBO reports* **13**, 83-89.
- Volz, J., Osta, M. A., Kafatos, F. C. and Muller, H. M.** (2005). The roles of two clip domain serine proteases in innate immune responses of the malaria vector *Anopheles gambiae*. *The Journal of biological chemistry* **280**, 40161-40168.
- Volz, J., Muller, H. M., Zdanowicz, A., Kafatos, F. C. and Osta, M. A.** (2006). A genetic module regulates the melanization response of *Anopheles* to *Plasmodium*. *Cellular microbiology* **8**, 1392.
- Weiss, B. L., Wang, J. and Aksoy, S.** (2011). Tsetse immune system maturation requires the presence of obligate symbionts in larvae. *PLoS Biol* **9**, e1000619.
- Weiss, B. L., Maltz, M. and Aksoy, S.** (2012). Obligate symbionts activate immune system development in the tsetse fly. *Journal of immunology* **188**, 3395-3403.
- Wynn, T. A., Chawla, A. and Pollard, J. W.** (2013). Macrophage biology in development, homeostasis and disease. *Nature* **496**, 445-455.
- Yassine, H., Kamareddine, L. and Osta, M. A.** (2012). The mosquito melanization response is implicated in defense against the entomopathogenic fungus *Beauveria bassiana*. *PLoS pathogens* **8**, e1003029.
- Zettervall, C. J., Anderl, I., Williams, M. J., Palmer, R., Kurucz, E., Ando, I. and Hultmark, D.** (2004). A directed screen for genes involved in *Drosophila* blood cell activation. *Proceedings of the National Academy of Sciences of the United States of America* **101**, 14192-14197.

## Figure Legends

### 468 **Figure 1. Blood Feeding Induces Hemocyte Proliferation.**

469 (A) Hemocyte numbers are increased significantly in blood fed (BF) as compared to sugar fed  
470 (SF) mosquitoes (Mann-Whitney U-Test).  $n = 11$  for each group from two independent  
471 biological replicates, graphed as median with interquartile range. (B) EdU incorporation is  
472 increased significantly in hemocytes from BF females (Mann-Whitney U test).  $n = 14$  for each  
473 group, graphed as median with interquartile range. For each data point, 300-400 cells were  
474 assessed from a hemocyte pool collected from two mosquitoes. Confocal images of  
475 representative EdU-positive hemocytes are shown in panel (C). Blue, DAPI; green, EdU; scale  
476 bar is 10 $\mu$ m. (D) Flow cytometry analysis of PI-stained hemocytes from sugar fed and blood fed  
477 mosquitoes. Dot plots of PI fluorescent signal area over width (expressed in arbitrary units)  
478 illustrate DNA content per cell. Gates were drawn to eliminate putative aggregates based on high  
479 signal width from further analysis. Histograms show measurements for PI staining and thus DNA  
480 content for the gated cells. Markers designate three hemocyte populations based on DNA  
481 content, M1 representing euploid, M2 and 3 representing aneuploid cells. Percentages of cells  
482 within the three markers are indicated above the brackets. The figure shows a representative  
483 result from three independent biological replicates.

### 485 **Figure 2. Blood Feeding Induces Hemocyte –Population and –Morphological Changes**

486 (A) The percentage of euploid (white) and aneuploid cells (gray) obtained from the flow  
487 cytometry analyses of PI-stained hemocytes are graphed as mean +/- s.e.m.. Euploid cells were  
488 gated (B) and analyzed for their size (FSC) and granularity (SSC). Axes are shown in arbitrary  
489 units. Density dot plots (C) illustrate size and granularity (expressed as arbitrary units) and their  
490 intensity on a blue to white color scale. (D) Overlaying histograms of sugar fed (open) and blood  
491 fed (filled) euploid hemocytes reveal an increase in average cell size and granularity after a  
492 blood meal. Data shown are representative of three independent experiments.

### 494 **Figure 3. Blood Feeding Increases Expression of Several Cell Activation Markers**

495 Hemocytes from sugar fed and blood fed females were analyzed for blood meal-induced  
496 activation markers.  $n = 91$  for WGA (A),  $n = 126$  for pERK (B),  $n = 103$  for TEP-1 (C),  $n = 136$

497 for PPO6 (**D**). Confocal maximum intensity projections are shown for all stains, blue, DAPI;  
498 green, WGA; red, pERK (B), TEP-1 (C), and PPO6 (D). Scale bar is 10µm. Quantification of  
499 activation markers was graphed as median with interquartile range. Blood feeding led to  
500 significant increase in fluorescence for all IFA analyses (Mann-Whitney U test,  $P < 0.0001$ ).  
501 Experiments were performed in triplicate with one representative experiment image and graph  
502 shown for each hemocyte activation marker. Results from all replicates are shown in Fig. S2.  
503





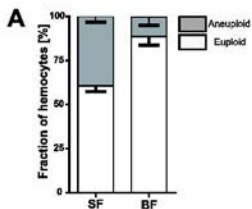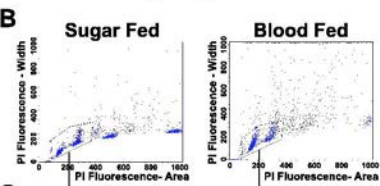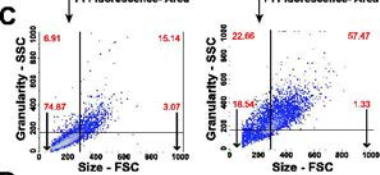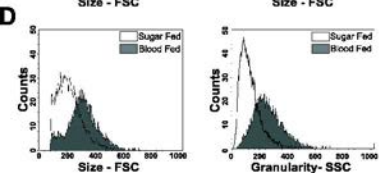

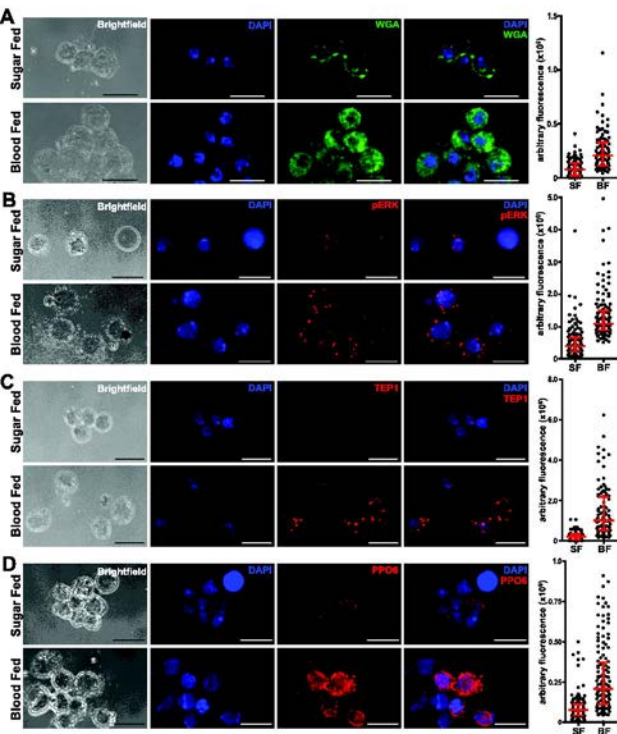

Source: https://cob.silverchair.com/jeb/article-pdf/doi/10.1242/jeb.094573/2037486/jeb_094573.pdf
